# Supplementary material for: Simulation-Based Analysis of Trial Design in Regional Anesthesia
Source: Anesthesiol Res Pract. 2024 Mar 15;2024:6651894. doi: 10.1155/2024/6651894 (PMC10959581; doi:10.1155/2024/6651894)
Supplement: Supplementary Materials — Appendix Table 1: combinations of block type and indication included in search of regional anesthesia meta-analyses, and characteristics coded from each article. Appendix 2: data elements coded from each meta-analysis article. Appendix 3: Stata program to simulate sequence of randomized controlled trials. [file 6651894.f1.zip]

Archive with 3 entries (3 files):
- Supplemental Appendix 3.docx
- Supplemental Appendix Table 1.docx
- Supplemental Appendix Table 2.docx
